# Supplementary material for: Development of a genetically programed vanillin-sensing bacterium for high-throughput screening of lignin-degrading enzyme libraries
Source: PubMed Central journal article supplement (PMC5291986; doi:10.1186/s13068-017-0720-5), 2017-02-03
Supplement: 13068_2017_720_MOESM1_ESM.pdf [file 13068_2017_720_MOESM1_ESM.pdf]

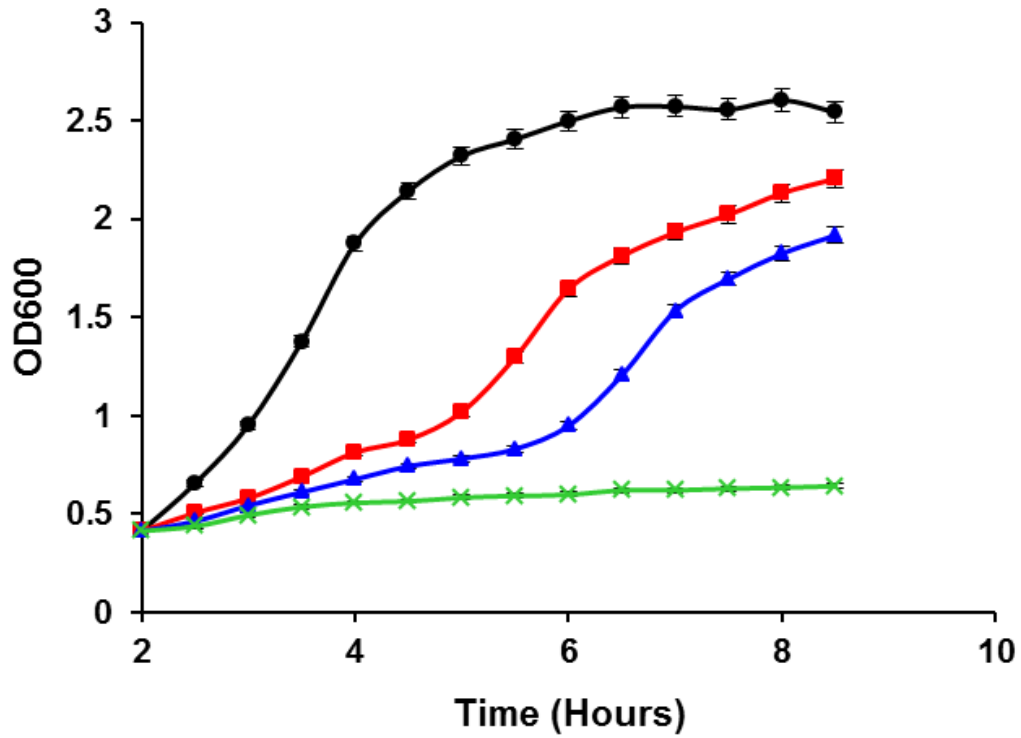

**Figure S1.** Determination of sub-lethal dose of vanillin on *E. coli* BL21 cells. The cells were grown in LB media containing 0.1 mg/ml ampicillin up to OD<sub>600</sub> = 0.5 followed by addition of different concentrations of vanillin and microbial growth was monitored by measuring the OD<sub>600</sub> at 30 minute intervals. The vanillin concentrations studied are 0 mM (black circle), 5 mM (red square), 7 mM (blue triangle) and 10 mM (green cross).

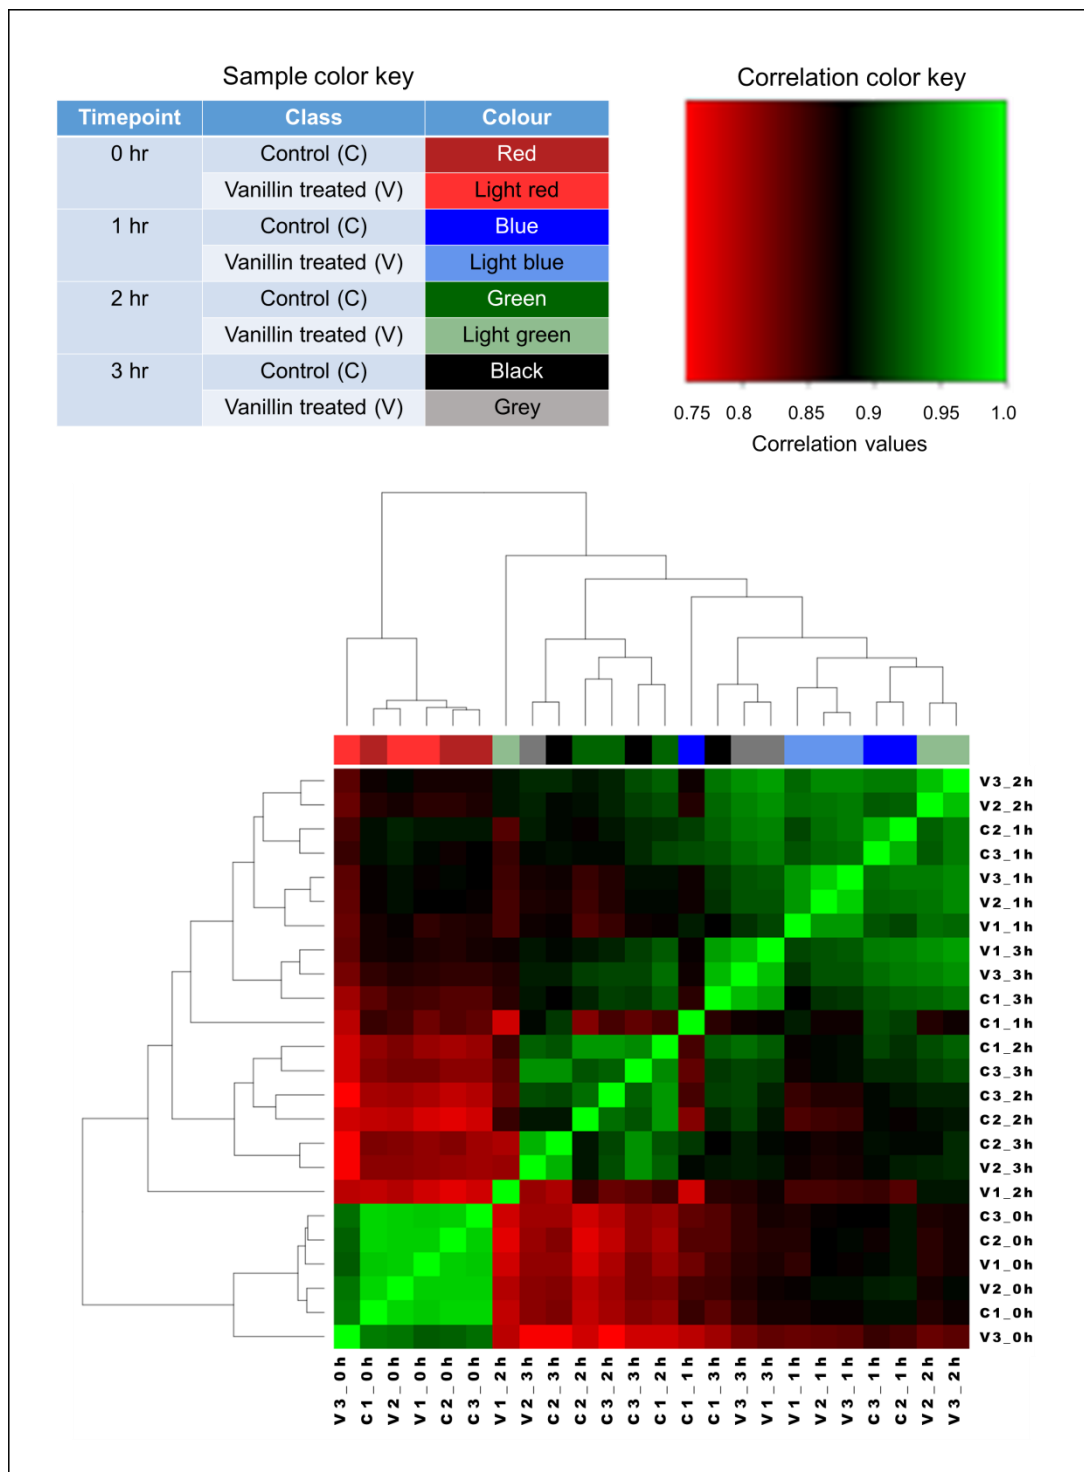

**Figure S2.** Cluster heat map showing global gene expression correlation between different sets of samples used in RNAseq experiments. The data shows significant variation in global expression profiles in response to vanillin treatment. C or V stands for ‘control’ and ‘vanillin treated’ sample respectively. The following number (1, 2 or 3) indicate sample number of the triplicate, and 0h, 1h, 2h and 3h indicate the sampling time points. The hierarchical clustering

was performed using Spearman correlation coefficients of log2 on the FPKM expression matrix in R v3.1.0.

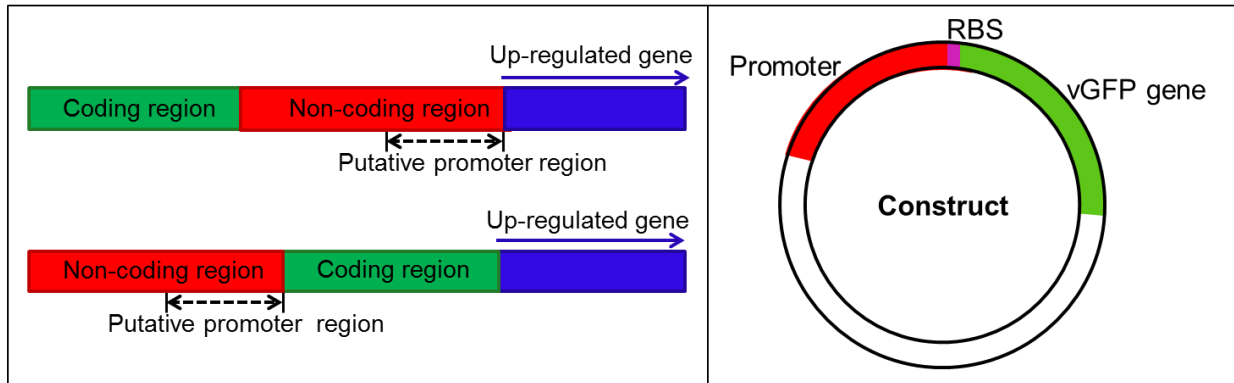

**Figure S3.** Schematic diagram showing location of putative promoter region (left panel) and the plasmid constructs for development of the whole-cell biosensor (right panel).

**Table S1.** Top seven up-regulated genes of *E. coli* BL21 strain after exposure to sublethal dose of vanillin and function of the encoded proteins.

| <b>Serial number</b> | <b>Gene name</b> | <b>Upregulation fold</b> | <b>Encoded protein/ Function</b>                                                                                                                                 |
|----------------------|------------------|--------------------------|------------------------------------------------------------------------------------------------------------------------------------------------------------------|
| <b>1</b>             | <i>yjhD</i>      | 15                       | Hypothetical protein: Function unknown                                                                                                                           |
| <b>2</b>             | <i>yijF</i>      | 12                       | DUF1287 family protein. Function Unknown                                                                                                                         |
| <b>3</b>             | <i>ydcI</i>      | 11                       | LysR-type DNA-binding transcriptional regulator.                                                                                                                 |
| <b>4</b>             | <i>proA</i>      | 11                       | Subunit of glutamate-5-semialdehyde dehydrogenase and gamma-glutamyl kinase-GP-reductase multienzyme complex. Catalyzes the first step in the proline synthesis. |
| <b>5</b>             | <i>yeiW</i>      | 9                        | UPF0153 cysteine cluster protein. Putative zinc- or iron-chelating domain: pfam03692 family.                                                                     |
| <b>6</b>             | <i>higA</i>      | 6.5                      | Antitoxin of the HigB-HigA toxin-antitoxin system.                                                                                                               |
| <b>7</b>             | <i>sodC</i>      | 6                        | Superoxide dismutase precursor. Putative Cu, Zn detoxification.                                                                                                  |

**Table S2. Assayed promoter sequences from top seven up-regulated genes.**

**Promoter 1 (yjhD) :**

atccatagctttcgcggcatctgccaccgtgtatcttctgggtcaacaaccagttgagcggattcgcggtt  
taaactctgcgctgaaatctcttttttcatggagcacctgtgttctgaggtgagcatatcacc  
tctgttcaggtggccaaattcagtggtgccacttcagccctgattcgacttttacaatgacttatctgg  
acgcatgaagaacgtcaggaataaccaataacaagcaatgacggaaccgtagaatggtaaactcc  
agttgcctgttttgcgataata

**Promoter 2 (yijF) :**

Cctactccaaactcccggcttgcgggagtttgaacgcaaaattgcctgatgcgctacgcttatcag  
gcctacgcaatctctgcaatatattgaatctgcgtgctttttaggcccggataaggcgttactccgc  
atccggcactctgtgccagtaactgaaactcccagttgttcaggaatctttatccgcttctggac  
atcttctctacagaacaatcgttagcccgggaaggtcgaatctgtgactcttattttcacggacgaacc  
ag

**Promoter 3 (ydcI) :**

agtaatctggagtgtaggtaaccgcattcactctggcgggaagaatttacaactgtgatctcgcgcg  
gaaaacatcaatattatccattttgctgtaacataattgctttaattgtaataatattttgcaatca  
agttatcataatcaacaacttcacttgtcagcgacaccgcttcgtttttaacatcgctt

**Promoter 4 (proA) :**

aacgcgcgaatattcagcgggagagtcctcgttgaaaacaggaaagtttttaacctgagattgttaaag  
atataattacagattaataatattctttaaagtggtaatttagtaaatctgtaataaaaagcgtaaaaca  
actgccgctaggcttgcgtgatcccgcgcaacaaaacgccatgctttgctcgcagatggttggcaaccg  
acgacagtctgctaaaacgcttgcgtttgatatcatttttctaaaattgaatggcagagaatc

**Promoter 5 (yeiW) :**

cgaaaaattcctgtagtcgaaaaatgtcaaaaatatcgcgacaaagtactcgcgacgggcctttcgggc  
aagtggatttcgcacttttgcgtggtgcaaaaaaggtggtagctgtgcgcgctcatcaatccggtggta  
accttaagagaacaacgt

**Promoter 6 (higA) :**

gattgggagttacctgccggatgcggcgtaaacgccttatccggcctacgttcagcacgttactccag  
gccggataagacgcggcaagcgtcgcacccggcaatgtctgccagttctggaatcgcgcttccataa  
aacaaaaatccctgtcaccatcgtctacattctcttggtttagcgtttttctacgtttattcttccgt  
cacacagataaattcatccggttgccaatctggcaacggatgttatcatattgccaatttgcaacgga  
cgatgaaga

**Promoter 7 (sodC) :**

ggtgaatccacgttgcaggcaagttgctcgcctgcgagagatggttcgcgagtatcatgttcgg  
tgtgtttgttcatgcgttggagtgtagtagaccagtcggctctagtgcaagcaagttgctactttgga  
cattaacagcttcaataatggtaataatcttatctgaggaggcgaa

**Table S3.** Fluorescence of the 5 mM vanillin induced live cell biosensors (Lcb1 – Lcb7); the fluorescence was measured using 100 µl overnight-induced cell suspension (OD<sub>600</sub> = 1.0)

| Sensor         | Fluorescence | <u>Standard deviation</u> |
|----------------|--------------|---------------------------|
| Lcb1           | 13,570       | <u>711</u>                |
| Lcb2           | 12,400       | <u>1050</u>               |
| Lcb3           | 10,740       | <u>563</u>                |
| Lcb4           | 430,020      | <u>55682</u>              |
| Lcb5           | 174,050      | <u>13854</u>              |
| Lcb6           | 19,700       | <u>1919</u>               |
| Lcb7           | 15,640       | <u>1894</u>               |
| <i>E. coli</i> | 105          | <u>18</u>                 |
